# Supplementary material for: Neurexins in serotonergic neurons regulate neuronal survival, serotonin transmission, and complex mouse behaviors
Source: eLife journal article supplement (doi:10.7554/elife.85058), 2023-01-25
Supplement: fig1-data1 [file Figure 1-Source Data File.xlsx]

## Sheet: Fig1A_5-HT_meta.data
	orig.ident	nCount_RNA	nFeature_RNA	RNA_snn_res.0.5	seurat_clusters	cluster_rev
SRR9863372	5ht	1.9117e+06	9708	2	2	DR2
SRR9863383	5ht	1.50777e+06	9661	2	2	DR2
SRR9863384	5ht	1.97013e+06	10610	7	7	DR3
SRR9863389	5ht	863531	9362	6	6	DR5
SRR9863390	5ht	2.26873e+06	11259	7	7	DR3
SRR9863396	5ht	1.64071e+06	11304	2	2	DR2
SRR9863398	5ht	517339	8987	7	7	DR3
SRR9863399	5ht	1.39292e+06	9714	7	7	DR3
SRR9863403	5ht	910297	8931	7	7	DR3
SRR9863406	5ht	1.0178e+06	10062	2	2	DR2
SRR9863407	5ht	1.76774e+06	11055	7	7	DR3
SRR9863412	5ht	961606	10488	2	2	DR2
SRR9863418	5ht	1.22752e+06	10361	7	7	DR3
SRR9863424	5ht	789085	8656	2	2	DR2
SRR9863425	5ht	852885	9459	6	6	DR5
SRR9863426	5ht	716312	9460	1	1	MR2
SRR9863427	5ht	833764	11027	9	9	cDR
SRR9863430	5ht	984997	10890	5	5	DR6
SRR9863431	5ht	547060	10328	5	5	DR6
SRR9863432	5ht	424292	9345	1	1	MR2
SRR9863433	5ht	256709	9488	1	1	MR2
SRR9863436	5ht	901939	11084	0	0	DR4
SRR9863437	5ht	488720	10478	4	4	MR1
SRR9863438	5ht	590496	9527	3	3	MR4
SRR9863441	5ht	1.06765e+06	10553	4	4	MR1
SRR9863442	5ht	714464	10871	1	1	MR2
SRR9863443	5ht	281272	9178	10	10	MR3
SRR9863444	5ht	767282	10617	1	1	MR2
SRR9863445	5ht	522484	10219	4	4	MR1
SRR9863448	5ht	884996	10679	1	1	MR2
SRR9863449	5ht	618987	10957	0	0	DR4
SRR9863452	5ht	307067	9891	8	8	DR1
SRR9863454	5ht	724128	10081	4	4	MR1
SRR9863455	5ht	565583	10333	4	4	MR1
SRR9863457	5ht	722105	9873	5	5	DR6
SRR9863458	5ht	852958	11380	4	4	MR1
SRR9863459	5ht	825567	10099	3	3	MR4
SRR9863460	5ht	921669	11551	8	8	DR1
SRR9863461	5ht	303608	9449	1	1	MR2
SRR9863463	5ht	878150	10773	8	8	DR1
SRR9863464	5ht	327694	8903	1	1	MR2
SRR9863466	5ht	908139	11120	5	5	DR6
SRR9863469	5ht	930687	11168	3	3	MR4
SRR9863470	5ht	555906	10845	4	4	MR1
SRR9863471	5ht	665898	10635	4	4	MR1
SRR9863472	5ht	818145	10887	3	3	MR4
SRR9863474	5ht	668260	10370	1	1	MR2
SRR9863475	5ht	736814	10130	9	9	cDR
SRR9863478	5ht	657558	10985	0	0	DR4
SRR9863482	5ht	444428	9886	3	3	MR4
SRR9863483	5ht	293653	8797	0	0	DR4
SRR9863484	5ht	591824	10870	0	0	DR4
SRR9863486	5ht	431578	9845	5	5	DR6
SRR9863489	5ht	694732	10668	3	3	MR4
SRR9863490	5ht	1051655	11088	4	4	MR1
SRR9863491	5ht	379148	10186	5	5	DR6
SRR9863492	5ht	596739	10260	1	1	MR2
SRR9863493	5ht	855617	11182	0	0	DR4
SRR9863494	5ht	337603	10137	4	4	MR1
SRR9863495	5ht	812030	10159	3	3	MR4
SRR9863496	5ht	776452	10841	1	1	MR2
SRR9863499	5ht	598567	10933	4	4	MR1
SRR9863502	5ht	586892	10622	0	0	DR4
SRR9863503	5ht	398563	10650	0	0	DR4
SRR9863505	5ht	989445	10741	0	0	DR4
SRR9863510	5ht	551113	9447	0	0	DR4
SRR9863511	5ht	548294	9986	1	1	MR2
SRR9863514	5ht	834453	10942	3	3	MR4
SRR9863515	5ht	241066	8306	8	8	DR1
SRR9863516	5ht	916480	10425	5	5	DR6
SRR9863520	5ht	539109	9488	5	5	DR6
SRR9863521	5ht	482632	10763	0	0	DR4
SRR9863524	5ht	286718	9638	0	0	DR4
SRR9863527	5ht	489829	9942	10	10	MR3
SRR9863528	5ht	1.24779e+06	11104	3	3	MR4
SRR9863532	5ht	658041	10379	8	8	DR1
SRR9863535	5ht	1.10867e+06	10857	0	0	DR4
SRR9863538	5ht	835236	11186	0	0	DR4
SRR9863540	5ht	934022	10080	4	4	MR1
SRR9863541	5ht	409859	9151	10	10	MR3
SRR9863542	5ht	543633	10378	4	4	MR1
SRR9863543	5ht	655731	10642	0	0	DR4
SRR9863544	5ht	571576	9119	1	1	MR2
SRR9863547	5ht	631122	9867	9	9	cDR
SRR9863549	5ht	775952	10259	8	8	DR1
SRR9863550	5ht	886762	11207	0	0	DR4
SRR9863551	5ht	695176	10753	1	1	MR2
SRR9863553	5ht	1.16035e+06	11304	8	8	DR1
SRR9863554	5ht	529835	10685	4	4	MR1
SRR9863555	5ht	399738	9303	1	1	MR2
SRR9863556	5ht	373745	9100	0	0	DR4
SRR9863558	5ht	603016	10145	5	5	DR6
SRR9863559	5ht	757422	11290	5	5	DR6
SRR9863562	5ht	858874	11108	0	0	DR4
SRR9863563	5ht	469554	10777	0	0	DR4
SRR9863565	5ht	962308	11151	0	0	DR4
SRR9863568	5ht	383155	9672	5	5	DR6
SRR9863569	5ht	391272	10110	3	3	MR4
SRR9863570	5ht	683878	9834	1	1	MR2
SRR9863574	5ht	872554	10933	5	5	DR6
SRR9863576	5ht	687639	9753	5	5	DR6
SRR9863577	5ht	992398	10302	8	8	DR1
SRR9863583	5ht	394263	10012	1	1	MR2
SRR9863586	5ht	499328	10072	1	1	MR2
SRR9863587	5ht	523160	10660	0	0	DR4
SRR9863588	5ht	578666	10215	8	8	DR1
SRR9863589	5ht	422987	9455	3	3	MR4
SRR9863591	5ht	1.12012e+06	10672	3	3	MR4
SRR9863592	5ht	683166	10396	5	5	DR6
SRR9863593	5ht	389602	10295	4	4	MR1
SRR9863596	5ht	416643	10325	0	0	DR4
SRR9863597	5ht	966677	10729	5	5	DR6
SRR9863602	5ht	487373	10160	3	3	MR4
SRR9863603	5ht	684235	10594	8	8	DR1
SRR9863604	5ht	493766	10278	8	8	DR1
SRR9863605	5ht	516935	9843	3	3	MR4
SRR9863607	5ht	564910	9895	5	5	DR6
SRR9863608	5ht	686376	11016	0	0	DR4
SRR9863609	5ht	463395	8592	0	0	DR4
SRR9863610	5ht	585053	10458	4	4	MR1
SRR9863613	5ht	776314	11243	0	0	DR4
SRR9863614	5ht	551361	10115	5	5	DR6
SRR9863616	5ht	323369	8813	0	0	DR4
SRR9863619	5ht	629446	10194	5	5	DR6
SRR9863620	5ht	702318	10914	4	4	MR1
SRR9863621	5ht	725004	11017	4	4	MR1
SRR9863622	5ht	861620	10557	1	1	MR2
SRR9863623	5ht	498652	9907	1	1	MR2
SRR9863625	5ht	740734	10855	8	8	DR1
SRR9863626	5ht	434300	10573	1	1	MR2
SRR9863627	5ht	377934	9634	4	4	MR1
SRR9863628	5ht	697899	9788	5	5	DR6
SRR9863630	5ht	581056	10013	3	3	MR4
SRR9863631	5ht	736688	10382	5	5	DR6
SRR9863632	5ht	390413	9605	4	4	MR1
SRR9863634	5ht	471436	9543	1	1	MR2
SRR9863635	5ht	241536	9113	0	0	DR4
SRR9863636	5ht	707886	10326	1	1	MR2
SRR9863637	5ht	542397	9666	5	5	DR6
SRR9863638	5ht	712575	10845	3	3	MR4
SRR9863640	5ht	521436	10013	5	5	DR6
SRR9863642	5ht	334675	9279	2	2	DR2
SRR9863643	5ht	527504	10432	0	0	DR4
SRR9863646	5ht	739677	10438	9	9	cDR
SRR9863647	5ht	334793	9914	1	1	MR2
SRR9863648	5ht	442311	9398	10	10	MR3
SRR9863649	5ht	917194	11387	0	0	DR4
SRR9863652	5ht	757972	10690	4	4	MR1
SRR9863654	5ht	681338	10067	0	0	DR4
SRR9863655	5ht	801094	11231	0	0	DR4
SRR9863656	5ht	759284	10986	4	4	MR1
SRR9863657	5ht	820877	9541	10	10	MR3
SRR9863658	5ht	511009	9518	5	5	DR6
SRR9863659	5ht	302708	9227	0	0	DR4
SRR9863660	5ht	670468	10321	1	1	MR2
SRR9863661	5ht	339013	9346	0	0	DR4
SRR9863662	5ht	236511	9548	1	1	MR2
SRR9863663	5ht	563555	9880	1	1	MR2
SRR9863664	5ht	498016	9787	3	3	MR4
SRR9863665	5ht	548568	10500	1	1	MR2
SRR9863669	5ht	870780	10572	8	8	DR1
SRR9863670	5ht	1.29706e+06	11732	0	0	DR4
SRR9863673	5ht	422022	10082	0	0	DR4
SRR9863674	5ht	708704	10830	4	4	MR1
SRR9863675	5ht	870104	10336	3	3	MR4
SRR9863676	5ht	1.49815e+06	11803	0	0	DR4
SRR9863677	5ht	989753	11567	4	4	MR1
SRR9863678	5ht	1.04748e+06	11077	3	3	MR4
SRR9863679	5ht	921624	10277	1	1	MR2
SRR9863680	5ht	1.01216e+06	11178	0	0	DR4
SRR9863681	5ht	943359	11454	0	0	DR4
SRR9863682	5ht	652195	10685	8	8	DR1
SRR9863683	5ht	356741	9900	3	3	MR4
SRR9863686	5ht	601630	10828	0	0	DR4
SRR9863687	5ht	746304	10608	0	0	DR4
SRR9863690	5ht	841376	10138	3	3	MR4
SRR9863692	5ht	779153	10623	1	1	MR2
SRR9863693	5ht	787098	10549	0	0	DR4
SRR9863694	5ht	995270	11577	8	8	DR1
SRR9863697	5ht	863388	10775	1	1	MR2
SRR9863698	5ht	331895	9515	3	3	MR4
SRR9863699	5ht	653316	10779	4	4	MR1
SRR9863700	5ht	690226	10213	1	1	MR2
SRR9863701	5ht	323906	8826	1	1	MR2
SRR9863702	5ht	586574	10066	1	1	MR2
SRR9863703	5ht	836115	10851	1	1	MR2
SRR9863705	5ht	941093	11206	0	0	DR4
SRR9863706	5ht	892771	11490	0	0	DR4
SRR9863708	5ht	892454	10977	1	1	MR2
SRR9863709	5ht	955954	10623	9	9	cDR
SRR9863710	5ht	498162	9955	3	3	MR4
SRR9863711	5ht	1.02865e+06	10712	4	4	MR1
SRR9863712	5ht	541375	10393	5	5	DR6
SRR9863713	5ht	569323	10446	3	3	MR4
SRR9863715	5ht	798040	11010	1	1	MR2
SRR9863718	5ht	533215	10711	4	4	MR1
SRR9863719	5ht	950996	11572	0	0	DR4
SRR9863721	5ht	898642	11169	0	0	DR4
SRR9863722	5ht	783470	10787	1	1	MR2
SRR9863725	5ht	850248	10958	1	1	MR2
SRR9863728	5ht	899214	11044	3	3	MR4
SRR9863731	5ht	539212	9901	0	0	DR4
SRR9863732	5ht	605900	10110	8	8	DR1
SRR9863736	5ht	438738	10645	0	0	DR4
SRR9863737	5ht	775197	10787	8	8	DR1
SRR9863739	5ht	404665	9856	8	8	DR1
SRR9863740	5ht	438002	10433	8	8	DR1
SRR9863741	5ht	873831	10762	1	1	MR2
SRR9863742	5ht	550201	9945	1	1	MR2
SRR9863743	5ht	999519	11469	4	4	MR1
SRR9863745	5ht	375987	10042	0	0	DR4
SRR9863746	5ht	610243	10115	3	3	MR4
SRR9863748	5ht	593425	10293	1	1	MR2
SRR9863749	5ht	397129	9034	5	5	DR6
SRR9863753	5ht	571894	10173	1	1	MR2
SRR9863754	5ht	403236	10016	4	4	MR1
SRR9863757	5ht	413906	9745	1	1	MR2
SRR9863758	5ht	262455	9099	0	0	DR4
SRR9863759	5ht	661647	10774	8	8	DR1
SRR9863763	5ht	325864	8990	10	10	MR3
SRR9863766	5ht	915164	10938	5	5	DR6
SRR9863768	5ht	822943	10132	3	3	MR4
SRR9863769	5ht	422995	10385	3	3	MR4
SRR9863770	5ht	410846	9450	5	5	DR6
SRR9863772	5ht	658069	10702	0	0	DR4
SRR9863773	5ht	530061	9838	3	3	MR4
SRR9863774	5ht	511150	10050	1	1	MR2
SRR9863775	5ht	1.12249e+06	11470	0	0	DR4
SRR9863778	5ht	925518	11056	4	4	MR1
SRR9863779	5ht	340241	9495	1	1	MR2
SRR9863780	5ht	729664	10542	8	8	DR1
SRR9863781	5ht	578679	9209	1	1	MR2
SRR9863783	5ht	461378	8854	2	2	DR2
SRR9863784	5ht	910579	11261	4	4	MR1
SRR9863785	5ht	397780	9776	1	1	MR2
SRR9863787	5ht	814647	11197	0	0	DR4
SRR9863789	5ht	983802	10521	1	1	MR2
SRR9863790	5ht	612934	10033	1	1	MR2
SRR9863791	5ht	949026	11102	4	4	MR1
SRR9863792	5ht	319583	8514	3	3	MR4
SRR9863794	5ht	285480	9764	4	4	MR1
SRR9863797	5ht	777566	10668	5	5	DR6
SRR9863798	5ht	861256	10121	8	8	DR1
SRR9863799	5ht	796100	10635	1	1	MR2
SRR9863802	5ht	292637	9715	1	1	MR2
SRR9863803	5ht	621582	11000	0	0	DR4
SRR9863804	5ht	820497	10760	1	1	MR2
SRR9863805	5ht	674415	10393	1	1	MR2
SRR9863807	5ht	765672	9461	1	1	MR2
SRR9863808	5ht	296117	9377	3	3	MR4
SRR9863809	5ht	655847	10702	8	8	DR1
SRR9863811	5ht	500864	9901	5	5	DR6
SRR9863814	5ht	383346	9916	3	3	MR4
SRR9863815	5ht	639353	10848	4	4	MR1
SRR9863817	5ht	883885	10886	8	8	DR1
SRR9863819	5ht	736986	10436	1	1	MR2
SRR9863820	5ht	996812	11346	1	1	MR2
SRR9863821	5ht	634369	10614	4	4	MR1
SRR9863822	5ht	1.24654e+06	11042	3	3	MR4
SRR9863823	5ht	658448	10135	5	5	DR6
SRR9863824	5ht	486236	10211	8	8	DR1
SRR9863825	5ht	760991	10232	10	10	MR3
SRR9863826	5ht	166251	8817	0	0	DR4
SRR9863828	5ht	1.12041e+06	10678	3	3	MR4
SRR9863829	5ht	352446	9942	4	4	MR1
SRR9863830	5ht	176828	8426	5	5	DR6
SRR9863831	5ht	985622	10792	1	1	MR2
SRR9863832	5ht	301520	9346	1	1	MR2
SRR9863835	5ht	1.09327e+06	11316	8	8	DR1
SRR9863837	5ht	848852	10434	5	5	DR6
SRR9863838	5ht	430819	8453	0	0	DR4
SRR9863841	5ht	403252	8465	10	10	MR3
SRR9863842	5ht	240639	8966	1	1	MR2
SRR9863843	5ht	924016	11343	8	8	DR1
SRR9863844	5ht	177291	7907	1	1	MR2
SRR9863845	5ht	203986	9097	1	1	MR2
SRR9863846	5ht	519052	9650	5	5	DR6
SRR9863847	5ht	604917	9922	1	1	MR2
SRR9863848	5ht	366276	9706	1	1	MR2
SRR9863849	5ht	738024	9670	1	1	MR2
SRR9863850	5ht	570794	9838	9	9	cDR
SRR9863851	5ht	339108	9928	4	4	MR1
SRR9863853	5ht	1.16662e+06	11479	4	4	MR1
SRR9863863	5ht	479842	10075	0	0	DR4
SRR9863864	5ht	501584	9622	8	8	DR1
SRR9863865	5ht	1.16116e+06	11680	8	8	DR1
SRR9863868	5ht	585259	10409	0	0	DR4
SRR9863869	5ht	361331	9598	4	4	MR1
SRR9863870	5ht	773445	10390	4	4	MR1
SRR9863871	5ht	1.24843e+06	11745	4	4	MR1
SRR9863874	5ht	308652	9114	9	9	cDR
SRR9863875	5ht	755496	11388	4	4	MR1
SRR9863877	5ht	974940	10802	5	5	DR6
SRR9863878	5ht	291646	9383	1	1	MR2
SRR9863879	5ht	819064	9518	10	10	MR3
SRR9863880	5ht	386404	9858	5	5	DR6
SRR9863881	5ht	472457	10231	4	4	MR1
SRR9863883	5ht	122826	8633	0	0	DR4
SRR9863885	5ht	534356	9430	3	3	MR4
SRR9863886	5ht	684908	10251	0	0	DR4
SRR9863888	5ht	1.12814e+06	10151	3	3	MR4
SRR9863889	5ht	1.06851e+06	11427	0	0	DR4
SRR9863890	5ht	688111	10696	0	0	DR4
SRR9863891	5ht	1.00111e+06	10992	4	4	MR1
SRR9863892	5ht	752519	10406	1	1	MR2
SRR9863894	5ht	1.08044e+06	10796	4	4	MR1
SRR9863895	5ht	647689	10181	8	8	DR1
SRR9863896	5ht	318755	9631	1	1	MR2
SRR9863897	5ht	929245	11168	0	0	DR4
SRR9863898	5ht	1.0951e+06	11393	4	4	MR1
SRR9863900	5ht	794921	9884	1	1	MR2
SRR9863901	5ht	574546	10108	5	5	DR6
SRR9863902	5ht	520971	9864	5	5	DR6
SRR9863903	5ht	596876	9513	9	9	cDR
SRR9863904	5ht	1.11254e+06	10863	1	1	MR2
SRR9863905	5ht	501880	9907	1	1	MR2
SRR9863907	5ht	896023	10752	5	5	DR6
SRR9863908	5ht	417049	9903	5	5	DR6
SRR9863910	5ht	790840	9799	5	5	DR6
SRR9863912	5ht	873624	10103	1	1	MR2
SRR9863913	5ht	568312	10256	5	5	DR6
SRR9863914	5ht	301111	9965	0	0	DR4
SRR9863915	5ht	273943	8824	1	1	MR2
SRR9863916	5ht	662427	10606	5	5	DR6
SRR9863918	5ht	856536	10743	4	4	MR1
SRR9863919	5ht	633026	9972	1	1	MR2
SRR9863923	5ht	299537	7818	1	1	MR2
SRR9863934	5ht	377625	8803	10	10	MR3
SRR9863936	5ht	896479	10208	3	3	MR4
SRR9863937	5ht	830352	10687	4	4	MR1
SRR9863938	5ht	466839	10309	10	10	MR3
SRR9863939	5ht	722487	10564	3	3	MR4
SRR9863940	5ht	479603	9579	9	9	cDR
SRR9863941	5ht	252064	9581	0	0	DR4
SRR9863942	5ht	1.06604e+06	11506	8	8	DR1
SRR9863947	5ht	337420	9587	5	5	DR6
SRR9863949	5ht	750234	10283	0	0	DR4
SRR9863952	5ht	953993	10761	0	0	DR4
SRR9863953	5ht	481214	10260	1	1	MR2
SRR9863961	5ht	896897	9646	2	2	DR2
SRR9863967	5ht	687897	9847	7	7	DR3
SRR9863973	5ht	1.38572e+06	9756	2	2	DR2
SRR9863975	5ht	2.9564e+06	11887	7	7	DR3
SRR9863977	5ht	2.81476e+06	11479	2	2	DR2
SRR9863978	5ht	1.96703e+06	10760	7	7	DR3
SRR9863981	5ht	2.15292e+06	11394	2	2	DR2
SRR9863984	5ht	2349416	10632	7	7	DR3
SRR9863988	5ht	2.38258e+06	10875	7	7	DR3
SRR9863995	5ht	469773	8649	2	2	DR2
SRR9863997	5ht	1.7049e+06	10924	7	7	DR3
SRR9864003	5ht	971410	9776	2	2	DR2
SRR9864004	5ht	1.20419e+06	9971	6	6	DR5
SRR9864005	5ht	2.07995e+06	8023	2	2	DR2
SRR9864006	5ht	533812	9001	2	2	DR2
SRR9864007	5ht	1616300	10038	2	2	DR2
SRR9864008	5ht	1.70417e+06	11058	7	7	DR3
SRR9864012	5ht	1.09371e+06	9033	2	2	DR2
SRR9864015	5ht	1.39763e+06	10615	6	6	DR5
SRR9864017	5ht	1.44195e+06	9597	6	6	DR5
SRR9864020	5ht	2.50305e+06	11686	2	2	DR2
SRR9864021	5ht	948632	8975	2	2	DR2
SRR9864023	5ht	861141	10559	7	7	DR3
SRR9864025	5ht	1539759	10691	2	2	DR2
SRR9864029	5ht	2.16686e+06	10864	2	2	DR2
SRR9864031	5ht	361054	7850	9	9	cDR
SRR9864033	5ht	1.02721e+06	8482	7	7	DR3
SRR9864037	5ht	625828	8980	2	2	DR2
SRR9864039	5ht	682654	9887	7	7	DR3
SRR9864043	5ht	1.67968e+06	10999	7	7	DR3
SRR9864045	5ht	470330	9103	6	6	DR5
SRR9864047	5ht	2.11253e+06	11692	7	7	DR3
SRR9864049	5ht	1.86861e+06	10034	2	2	DR2
SRR9864050	5ht	1.64382e+06	10841	7	7	DR3
SRR9864057	5ht	1.63477e+06	10593	6	6	DR5
SRR9864059	5ht	1.15058e+06	10274	2	2	DR2
SRR9864061	5ht	1.01505e+06	9310	2	2	DR2
SRR9864067	5ht	1.42753e+06	10623	6	6	DR5
SRR9864069	5ht	883507	10140	2	2	DR2
SRR9864072	5ht	1.3671e+06	8743	2	2	DR2
SRR9864075	5ht	606595	9692	7	7	DR3
SRR9864076	5ht	1.50847e+06	10489	2	2	DR2
SRR9864078	5ht	865933	9267	7	7	DR3
SRR9864079	5ht	793153	10357	7	7	DR3
SRR9864080	5ht	2.05354e+06	10007	7	7	DR3
SRR9864081	5ht	1.98672e+06	11116	6	6	DR5
SRR9864089	5ht	1.13656e+06	10809	2	2	DR2
SRR9864095	5ht	472749	7981	2	2	DR2
SRR9864097	5ht	1.18254e+06	9455	2	2	DR2
SRR9864098	5ht	595222	8830	2	2	DR2
SRR9864103	5ht	2.14092e+06	10825	2	2	DR2
SRR9864105	5ht	946857	9943	2	2	DR2
SRR9864107	5ht	914925	10512	7	7	DR3
SRR9864109	5ht	1.25479e+06	10422	6	6	DR5
SRR9864110	5ht	938429	10528	7	7	DR3
SRR9864112	5ht	1569209	10248	2	2	DR2
SRR9864113	5ht	1.79285e+06	10581	7	7	DR3
SRR9864114	5ht	1.17225e+06	10739	0	0	DR4
SRR9864116	5ht	897583	9933	6	6	DR5
SRR9864117	5ht	1.63523e+06	10551	6	6	DR5
SRR9864118	5ht	1840481	10952	7	7	DR3
SRR9864120	5ht	1.60653e+06	10019	6	6	DR5
SRR9864122	5ht	698910	9720	7	7	DR3
SRR9864123	5ht	1.41039e+06	11139	2	2	DR2
SRR9864124	5ht	2.02823e+06	11161	2	2	DR2
SRR9864133	5ht	1.19768e+06	10540	7	7	DR3
SRR9864139	5ht	2.24343e+06	10893	2	2	DR2
SRR9864142	5ht	1.51568e+06	10784	2	2	DR2
SRR9864143	5ht	1347138	9265	7	7	DR3
SRR9864144	5ht	1577931	10869	7	7	DR3
SRR9864146	5ht	1.99602e+06	11060	7	7	DR3
SRR9864148	5ht	652239	8540	0	0	DR4
SRR9864152	5ht	927421	10925	7	7	DR3
SRR9864153	5ht	1.57706e+06	11059	7	7	DR3
SRR9864157	5ht	833244	10026	7	7	DR3
SRR9864158	5ht	629279	9747	2	2	DR2
SRR9864159	5ht	1.09934e+06	10540	2	2	DR2
SRR9864160	5ht	593699	9655	2	2	DR2
SRR9864164	5ht	749650	9704	7	7	DR3
SRR9864168	5ht	767717	9974	7	7	DR3
SRR9864175	5ht	867799	9212	2	2	DR2
SRR9864176	5ht	1.06765e+06	10757	7	7	DR3
SRR9864177	5ht	563782	10213	2	2	DR2
SRR9864179	5ht	518956	9291	2	2	DR2
SRR9864180	5ht	762704	9737	2	2	DR2
SRR9864181	5ht	1.05656e+06	10576	7	7	DR3
SRR9864184	5ht	1.07143e+06	10058	7	7	DR3
SRR9864187	5ht	485666	10226	6	6	DR5
SRR9864188	5ht	769995	10915	2	2	DR2
SRR9864189	5ht	743281	10660	2	2	DR2
SRR9864190	5ht	704671	10935	7	7	DR3
SRR9864191	5ht	602906	11086	7	7	DR3
SRR9864192	5ht	765951	11388	2	2	DR2
SRR9864193	5ht	704927	9863	2	2	DR2
SRR9864194	5ht	619716	10429	6	6	DR5
SRR9864195	5ht	856625	11224	6	6	DR5
SRR9864197	5ht	619637	10753	7	7	DR3
SRR9864198	5ht	498860	9738	6	6	DR5
SRR9864199	5ht	758955	10057	0	0	DR4
SRR9864200	5ht	680881	10796	2	2	DR2
SRR9864201	5ht	802366	10804	6	6	DR5
SRR9864203	5ht	653134	10231	1	1	MR2
SRR9864204	5ht	235933	8336	0	0	DR4
SRR9864205	5ht	836401	11227	7	7	DR3
SRR9864206	5ht	676547	10980	6	6	DR5
SRR9864207	5ht	584374	10423	6	6	DR5
SRR9864208	5ht	559176	10887	6	6	DR5
SRR9864209	5ht	923475	11205	0	0	DR4
SRR9864210	5ht	473839	10148	2	2	DR2
SRR9864212	5ht	706944	10683	7	7	DR3
SRR9864213	5ht	678420	11169	0	0	DR4
SRR9864214	5ht	653794	10674	2	2	DR2
SRR9864215	5ht	608984	11174	6	6	DR5
SRR9864216	5ht	672733	10543	6	6	DR5
SRR9864217	5ht	553502	10723	6	6	DR5
SRR9864218	5ht	604813	10737	6	6	DR5
SRR9864219	5ht	722819	10607	2	2	DR2
SRR9864220	5ht	554324	9948	6	6	DR5
SRR9864221	5ht	428303	10996	6	6	DR5
SRR9864222	5ht	679308	10966	2	2	DR2
SRR9864223	5ht	943470	10902	7	7	DR3
SRR9864224	5ht	946078	11341	6	6	DR5
SRR9864225	5ht	491398	8434	2	2	DR2
SRR9864227	5ht	823974	11317	6	6	DR5
SRR9864228	5ht	701058	10939	6	6	DR5
SRR9864229	5ht	853524	11000	6	6	DR5
SRR9864230	5ht	584165	10734	2	2	DR2
SRR9864231	5ht	583222	10474	6	6	DR5
SRR9864233	5ht	757832	10896	6	6	DR5
SRR9864235	5ht	707090	10958	6	6	DR5
SRR9864236	5ht	800034	11103	6	6	DR5
SRR9864237	5ht	701744	10924	6	6	DR5
SRR9864238	5ht	766567	11204	2	2	DR2
SRR9864239	5ht	736041	11290	7	7	DR3
SRR9864240	5ht	910460	10642	6	6	DR5
SRR9864241	5ht	721525	11028	2	2	DR2
SRR9864242	5ht	555087	10738	2	2	DR2
SRR9864243	5ht	702801	10734	0	0	DR4
SRR9864244	5ht	696390	10784	2	2	DR2
SRR9864245	5ht	727514	11296	6	6	DR5
SRR9864246	5ht	615234	11003	2	2	DR2
SRR9864247	5ht	335687	8814	7	7	DR3
SRR9864249	5ht	910770	11036	2	2	DR2
SRR9864251	5ht	667288	10678	2	2	DR2
SRR9864252	5ht	756324	10773	6	6	DR5
SRR9864253	5ht	929752	10703	7	7	DR3
SRR9864254	5ht	720361	11296	2	2	DR2
SRR9864255	5ht	870567	10958	7	7	DR3
SRR9864256	5ht	575404	10571	2	2	DR2
SRR9864257	5ht	986306	11605	6	6	DR5
SRR9864258	5ht	532842	10477	6	6	DR5
SRR9864259	5ht	687232	10500	7	7	DR3
SRR9864260	5ht	916182	11015	2	2	DR2
SRR9864261	5ht	776057	11711	6	6	DR5
SRR9864262	5ht	691436	10401	7	7	DR3
SRR9864263	5ht	733527	10863	2	2	DR2
SRR9864264	5ht	688979	10783	6	6	DR5
SRR9864265	5ht	549747	9945	0	0	DR4
SRR9864266	5ht	663881	10451	6	6	DR5
SRR9864268	5ht	775963	10498	6	6	DR5
SRR9864269	5ht	454571	10217	2	2	DR2
SRR9864270	5ht	567797	10016	2	2	DR2
SRR9864271	5ht	838593	10871	2	2	DR2
SRR9864272	5ht	992628	11629	2	2	DR2
SRR9864273	5ht	835289	10443	6	6	DR5
SRR9864275	5ht	583772	10079	6	6	DR5
SRR9864276	5ht	359274	9216	7	7	DR3
SRR9864277	5ht	711681	10026	0	0	DR4
SRR9864278	5ht	708642	10957	6	6	DR5
SRR9864279	5ht	831282	10555	6	6	DR5
SRR9864280	5ht	695241	10829	6	6	DR5
SRR9864281	5ht	845252	10977	2	2	DR2
SRR9864282	5ht	540526	10538	6	6	DR5
SRR9864283	5ht	745890	11062	6	6	DR5
SRR9864285	5ht	800880	11214	6	6	DR5
SRR9864286	5ht	955846	11157	7	7	DR3
SRR9864287	5ht	741262	10997	2	2	DR2
SRR9864288	5ht	924948	11428	2	2	DR2
SRR9864289	5ht	726972	11140	2	2	DR2
SRR9864290	5ht	880424	10327	7	7	DR3
SRR9864291	5ht	869321	10824	6	6	DR5
SRR9864292	5ht	882002	11093	6	6	DR5
SRR9864293	5ht	509428	9499	2	2	DR2
SRR9864294	5ht	759385	10145	2	2	DR2
SRR9864295	5ht	842963	11518	6	6	DR5
SRR9864296	5ht	788138	11554	6	6	DR5
SRR9864297	5ht	900606	11074	2	2	DR2
SRR9864299	5ht	734276	10837	6	6	DR5
SRR9864300	5ht	677224	11487	6	6	DR5
SRR9864301	5ht	822605	10662	7	7	DR3
SRR9864302	5ht	557430	10431	6	6	DR5
SRR9864303	5ht	873172	10522	6	6	DR5
SRR9864305	5ht	686838	10857	6	6	DR5
SRR9864306	5ht	566675	10428	6	6	DR5
SRR9864307	5ht	506862	9458	2	2	DR2
SRR9864308	5ht	649312	10694	2	2	DR2
SRR9864309	5ht	521951	10875	2	2	DR2
SRR9864310	5ht	631136	10818	6	6	DR5
SRR9864311	5ht	504889	10888	6	6	DR5
SRR9864312	5ht	791032	10161	7	7	DR3
SRR9864313	5ht	628229	11052	6	6	DR5
SRR9864314	5ht	877534	11004	2	2	DR2
SRR9864315	5ht	1.08334e+06	11783	2	2	DR2
SRR9864316	5ht	803664	10635	0	0	DR4
SRR9864317	5ht	365827	10509	6	6	DR5
SRR9864318	5ht	621579	10203	2	2	DR2
SRR9864319	5ht	816454	10899	2	2	DR2
SRR9864320	5ht	621133	10807	6	6	DR5
SRR9864321	5ht	782972	8910	2	2	DR2
SRR9864323	5ht	462032	9954	7	7	DR3
SRR9864324	5ht	574243	10973	6	6	DR5
SRR9864325	5ht	599389	10229	6	6	DR5
SRR9864326	5ht	822292	11362	6	6	DR5
SRR9864327	5ht	590876	10534	0	0	DR4
SRR9864328	5ht	436487	10194	6	6	DR5
SRR9864330	5ht	809996	10791	2	2	DR2
SRR9864331	5ht	623903	10833	6	6	DR5
SRR9864332	5ht	795965	10659	6	6	DR5
SRR9864333	5ht	623641	10675	2	2	DR2
SRR9864334	5ht	1.14653e+06	11506	2	2	DR2
SRR9864335	5ht	573548	10715	0	0	DR4
SRR9864336	5ht	854134	11047	7	7	DR3
SRR9864337	5ht	919610	11652	6	6	DR5
SRR9864338	5ht	889064	10684	7	7	DR3
SRR9864339	5ht	983457	11219	6	6	DR5
SRR9864340	5ht	762078	10563	7	7	DR3
SRR9864341	5ht	443318	11123	2	2	DR2
SRR9864342	5ht	640163	11014	6	6	DR5
SRR9864343	5ht	759226	10726	0	0	DR4
SRR9864344	5ht	800725	10990	6	6	DR5
SRR9864345	5ht	602978	10002	2	2	DR2
SRR9864347	5ht	677177	10443	7	7	DR3
SRR9864348	5ht	482119	10275	6	6	DR5
SRR9864349	5ht	704821	10791	6	6	DR5
SRR9864350	5ht	468732	10302	2	2	DR2
SRR9864351	5ht	575697	10625	7	7	DR3
SRR9864352	5ht	402970	9021	2	2	DR2
SRR9864353	5ht	636144	11011	6	6	DR5
SRR9864354	5ht	383645	9424	2	2	DR2
SRR9864355	5ht	430489	10102	2	2	DR2
SRR9864356	5ht	641590	10504	2	2	DR2
SRR9864357	5ht	714666	10213	2	2	DR2
SRR9864358	5ht	537795	10133	0	0	DR4
SRR9864359	5ht	581613	11144	2	2	DR2
SRR9864360	5ht	682050	10476	6	6	DR5
SRR9864361	5ht	589035	10685	6	6	DR5
SRR9864362	5ht	462651	10446	6	6	DR5
SRR9864363	5ht	551328	10483	6	6	DR5
SRR9864364	5ht	574694	10591	2	2	DR2
SRR9864365	5ht	388724	10816	6	6	DR5
SRR9864366	5ht	551042	11028	6	6	DR5
SRR9864367	5ht	530278	10175	0	0	DR4
SRR9864368	5ht	801414	11123	2	2	DR2
SRR9864369	5ht	751467	10804	2	2	DR2
SRR9864371	5ht	618352	10515	6	6	DR5
SRR9864372	5ht	489567	10502	2	2	DR2
SRR9864373	5ht	542460	9777	2	2	DR2
SRR9864374	5ht	460068	10479	7	7	DR3
SRR9864375	5ht	697236	11284	7	7	DR3
SRR9864376	5ht	444478	10295	6	6	DR5
SRR9864377	5ht	621866	10790	7	7	DR3
SRR9864378	5ht	444134	9225	1	1	MR2
SRR9864379	5ht	1.24507e+06	11183	0	0	DR4
SRR9864381	5ht	2.50831e+06	11306	0	0	DR4
SRR9864382	5ht	483415	9719	4	4	MR1
SRR9864383	5ht	986146	10702	1	1	MR2
SRR9864385	5ht	639746	9865	1	1	MR2
SRR9864386	5ht	1.73285e+06	10867	0	0	DR4
SRR9864388	5ht	1.0557e+06	10802	5	5	DR6
SRR9864390	5ht	422542	9425	3	3	MR4
SRR9864391	5ht	2.15206e+06	11406	1	1	MR2
SRR9864392	5ht	1.50979e+06	11075	0	0	DR4
SRR9864393	5ht	749627	9623	3	3	MR4
SRR9864394	5ht	1.28622e+06	10572	1	1	MR2
SRR9864395	5ht	783876	10177	3	3	MR4
SRR9864396	5ht	1.57139e+06	10234	0	0	DR4
SRR9864397	5ht	1.49856e+06	10832	3	3	MR4
SRR9864400	5ht	943888	11140	4	4	MR1
SRR9864401	5ht	1.67733e+06	9524	0	0	DR4
SRR9864402	5ht	1.29604e+06	9893	3	3	MR4
SRR9864403	5ht	871000	9803	3	3	MR4
SRR9864404	5ht	1.35833e+06	10652	5	5	DR6
SRR9864405	5ht	415515	9803	1	1	MR2
SRR9864407	5ht	1.07568e+06	10468	3	3	MR4
SRR9864408	5ht	697034	10447	3	3	MR4
SRR9864409	5ht	1.25595e+06	10486	5	5	DR6
SRR9864411	5ht	1.21702e+06	10733	7	7	DR3
SRR9864414	5ht	1.84214e+06	10899	1	1	MR2
SRR9864416	5ht	975458	10559	4	4	MR1
SRR9864417	5ht	1.11173e+06	10705	8	8	DR1
SRR9864419	5ht	1.75034e+06	10505	10	10	MR3
SRR9864421	5ht	1.37074e+06	11528	5	5	DR6
SRR9864422	5ht	916843	9434	1	1	MR2
SRR9864423	5ht	471253	9809	4	4	MR1
SRR9864424	5ht	1.19332e+06	9066	8	8	DR1
SRR9864425	5ht	1.14981e+06	10958	3	3	MR4
SRR9864426	5ht	509518	9461	5	5	DR6
SRR9864427	5ht	986301	9794	0	0	DR4
SRR9864428	5ht	509998	10062	3	3	MR4
SRR9864429	5ht	2011387	10982	0	0	DR4
SRR9864431	5ht	874083	10580	0	0	DR4
SRR9864432	5ht	1198918	11283	4	4	MR1
SRR9864433	5ht	426444	9578	1	1	MR2
SRR9864434	5ht	1.47758e+06	10740	9	9	cDR
SRR9864435	5ht	443116	9521	3	3	MR4
SRR9864436	5ht	560756	9869	5	5	DR6
SRR9864437	5ht	992415	10708	7	7	DR3
SRR9864438	5ht	1.00409e+06	10528	8	8	DR1
SRR9864439	5ht	920928	10356	0	0	DR4
SRR9864440	5ht	343911	8595	0	0	DR4
SRR9864441	5ht	1.77205e+06	11265	3	3	MR4
SRR9864442	5ht	1.17174e+06	11104	1	1	MR2
SRR9864443	5ht	754241	9864	3	3	MR4
SRR9864444	5ht	1.16275e+06	10396	1	1	MR2
SRR9864446	5ht	1.62163e+06	11243	0	0	DR4
SRR9864447	5ht	1088863	10720	4	4	MR1
SRR9864449	5ht	1.25592e+06	11055	5	5	DR6
SRR9864450	5ht	969758	10756	3	3	MR4
SRR9864454	5ht	1.1647e+06	11179	0	0	DR4
SRR9864455	5ht	737684	10153	8	8	DR1
SRR9864456	5ht	1.43638e+06	10581	5	5	DR6
SRR9864457	5ht	1.06613e+06	10536	6	6	DR5
SRR9864458	5ht	735919	9396	1	1	MR2
SRR9864459	5ht	1.15635e+06	11235	4	4	MR1
SRR9864461	5ht	1.66822e+06	11161	0	0	DR4
SRR9864462	5ht	1.19388e+06	10235	1	1	MR2
SRR9864463	5ht	1.3885e+06	11205	8	8	DR1
SRR9864464	5ht	1.05731e+06	10842	8	8	DR1
SRR9864465	5ht	565548	10245	3	3	MR4
SRR9864468	5ht	666393	9802	5	5	DR6
SRR9864469	5ht	1.49798e+06	11873	0	0	DR4
SRR9864470	5ht	1.4272e+06	11240	3	3	MR4
SRR9864472	5ht	501636	10413	5	5	DR6
SRR9864473	5ht	793134	10021	3	3	MR4
SRR9864474	5ht	1.47461e+06	10827	8	8	DR1
SRR9864477	5ht	915700	11219	4	4	MR1
SRR9864478	5ht	923380	11072	4	4	MR1
SRR9864479	5ht	1.40649e+06	11255	1	1	MR2
SRR9864481	5ht	612921	9084	0	0	DR4
SRR9864482	5ht	1.07123e+06	10353	10	10	MR3
SRR9864483	5ht	360678	9245	3	3	MR4
SRR9864485	5ht	834040	10416	5	5	DR6
SRR9864486	5ht	1.22433e+06	10563	0	0	DR4
SRR9864489	5ht	1.68423e+06	10959	0	0	DR4
SRR9864490	5ht	901292	10282	3	3	MR4
SRR9864491	5ht	1.28084e+06	11162	8	8	DR1
SRR9864492	5ht	948628	10608	10	10	MR3
SRR9864494	5ht	827876	9935	1	1	MR2
SRR9864495	5ht	588430	10195	3	3	MR4
SRR9864497	5ht	814047	9821	0	0	DR4
SRR9864498	5ht	989080	10813	1	1	MR2
SRR9864499	5ht	770962	10297	0	0	DR4
SRR9864501	5ht	1.93083e+06	11491	0	0	DR4
SRR9864502	5ht	1.56674e+06	11134	3	3	MR4
SRR9864503	5ht	1.37142e+06	10869	1	1	MR2
SRR9864504	5ht	1.37938e+06	11171	8	8	DR1
SRR9864505	5ht	1.21401e+06	11211	4	4	MR1
SRR9864506	5ht	1.78456e+06	10987	3	3	MR4
SRR9864507	5ht	1.88471e+06	11311	3	3	MR4
SRR9864509	5ht	1.59165e+06	11368	0	0	DR4
SRR9864510	5ht	499043	9937	1	1	MR2
SRR9864511	5ht	1.11011e+06	10121	0	0	DR4
SRR9864514	5ht	1276833	11111	8	8	DR1
SRR9864515	5ht	858876	10682	4	4	MR1
SRR9864518	5ht	1.19301e+06	10736	0	0	DR4
SRR9864519	5ht	1.21988e+06	10788	4	4	MR1
SRR9864520	5ht	1.17075e+06	11166	3	3	MR4
SRR9864523	5ht	1.39096e+06	10623	5	5	DR6
SRR9864525	5ht	632069	9931	1	1	MR2
SRR9864526	5ht	1.11737e+06	10850	0	0	DR4
SRR9864527	5ht	1.25301e+06	10728	8	8	DR1
SRR9864528	5ht	900381	11194	0	0	DR4
SRR9864529	5ht	1.41917e+06	10679	1	1	MR2
SRR9864530	5ht	1.08659e+06	10423	6	6	DR5
SRR9864531	5ht	1.45284e+06	11164	0	0	DR4
SRR9864533	5ht	568872	9771	4	4	MR1
SRR9864534	5ht	1.23113e+06	11091	0	0	DR4
SRR9864536	5ht	1175179	10651	4	4	MR1
SRR9864537	5ht	1.01651e+06	10947	1	1	MR2
SRR9864539	5ht	1.20756e+06	9874	1	1	MR2
SRR9864541	5ht	926359	9799	5	5	DR6
SRR9864542	5ht	657548	9969	5	5	DR6
SRR9864543	5ht	424582	10023	8	8	DR1
SRR9864544	5ht	671657	9870	10	10	MR3
SRR9864545	5ht	623696	10050	1	1	MR2
SRR9864546	5ht	1.48e+06	11645	0	0	DR4
SRR9864547	5ht	723451	10768	3	3	MR4
SRR9864548	5ht	385505	9723	1	1	MR2
SRR9864549	5ht	1.18488e+06	9572	0	0	DR4
SRR9864551	5ht	737088	9445	9	9	cDR
SRR9864552	5ht	879571	10219	0	0	DR4
SRR9864553	5ht	684394	9817	3	3	MR4
SRR9864554	5ht	1.34176e+06	11155	8	8	DR1
SRR9864555	5ht	578204	10046	4	4	MR1
SRR9864556	5ht	1.20035e+06	10876	0	0	DR4
SRR9864558	5ht	2.01884e+06	11887	0	0	DR4
SRR9864559	5ht	1.015e+06	10953	4	4	MR1
SRR9864561	5ht	1.85667e+06	10184	9	9	cDR
SRR9864562	5ht	710772	9117	3	3	MR4
SRR9864563	5ht	713780	9915	5	5	DR6
SRR9864564	5ht	1.25843e+06	11174	4	4	MR1
SRR9864565	5ht	523133	9593	3	3	MR4
SRR9864566	5ht	1.811e+06	11232	0	0	DR4
SRR9864568	5ht	1.80567e+06	11487	3	3	MR4
SRR9864569	5ht	1.11713e+06	9847	1	1	MR2
SRR9864571	5ht	1.38082e+06	10792	5	5	DR6
SRR9864573	5ht	873907	10478	4	4	MR1
SRR9864575	5ht	970833	10028	3	3	MR4
SRR9864576	5ht	1306050	10714	1	1	MR2
SRR9864581	5ht	1.35387e+06	10869	0	0	DR4
SRR9864584	5ht	935212	10048	3	3	MR4
SRR9864588	5ht	944474	11125	4	4	MR1
SRR9864590	5ht	1.36203e+06	11297	3	3	MR4
SRR9864592	5ht	1.02805e+06	11376	0	0	DR4
SRR9864593	5ht	761657	10484	4	4	MR1
SRR9864594	5ht	1.48747e+06	11175	0	0	DR4
SRR9864596	5ht	1.36857e+06	9820	4	4	MR1
SRR9864597	5ht	703287	10713	5	5	DR6
SRR9864598	5ht	765241	10807	5	5	DR6
SRR9864599	5ht	1563424	11386	4	4	MR1
SRR9864601	5ht	833622	8941	0	0	DR4
SRR9864602	5ht	665463	9813	1	1	MR2
SRR9864603	5ht	384319	9633	1	1	MR2
SRR9864605	5ht	1.50427e+06	10878	5	5	DR6
SRR9864608	5ht	986151	10974	3	3	MR4
SRR9864609	5ht	1.2046e+06	10745	3	3	MR4
SRR9864613	5ht	884271	10831	3	3	MR4
SRR9864617	5ht	1.20937e+06	11155	4	4	MR1
SRR9864618	5ht	1.13947e+06	10305	1	1	MR2
SRR9864619	5ht	663131	9543	1	1	MR2
SRR9864620	5ht	944398	10489	3	3	MR4
SRR9864621	5ht	1449766	10672	0	0	DR4
SRR9864622	5ht	1.17486e+06	10408	3	3	MR4
SRR9864623	5ht	1.18303e+06	10684	5	5	DR6
SRR9864625	5ht	825962	10017	3	3	MR4
SRR9864627	5ht	1.71653e+06	11404	0	0	DR4
SRR9864628	5ht	863679	10298	3	3	MR4
SRR9864629	5ht	727147	10863	1	1	MR2
SRR9864632	5ht	1.75449e+06	11422	6	6	DR5
SRR9864635	5ht	1.0888e+06	11090	3	3	MR4
SRR9864636	5ht	1.15843e+06	10216	9	9	cDR
SRR9864637	5ht	1.35902e+06	10974	1	1	MR2
SRR9864643	5ht	1.02284e+06	10307	1	1	MR2
SRR9864645	5ht	301129	9232	4	4	MR1
SRR9864646	5ht	495493	8789	10	10	MR3
SRR9864647	5ht	1.09015e+06	10537	3	3	MR4
SRR9864648	5ht	1152466	11531	4	4	MR1
SRR9864649	5ht	901127	9826	9	9	cDR
SRR9864651	5ht	1.10583e+06	11249	0	0	DR4
SRR9864652	5ht	792044	9761	5	5	DR6
SRR9864653	5ht	1.12554e+06	11355	4	4	MR1
SRR9864654	5ht	1.21406e+06	10201	1	1	MR2
SRR9864656	5ht	983684	10328	0	0	DR4
SRR9864657	5ht	713503	10010	1	1	MR2
SRR9864658	5ht	889755	10638	3	3	MR4
SRR9864659	5ht	1.21376e+06	11000	0	0	DR4
SRR9864663	5ht	638547	9982	3	3	MR4
SRR9864664	5ht	932346	10441	5	5	DR6
SRR9864666	5ht	1.14866e+06	10411	0	0	DR4
SRR9864667	5ht	803522	10500	1	1	MR2
SRR9864668	5ht	1.38034e+06	11494	3	3	MR4
SRR9864669	5ht	1.16499e+06	11107	4	4	MR1
SRR9864672	5ht	1.18557e+06	10691	4	4	MR1
SRR9864673	5ht	569400	9745	3	3	MR4
SRR9864674	5ht	751325	10016	5	5	DR6
SRR9864675	5ht	1644329	11694	5	5	DR6
SRR9864677	5ht	1.03186e+06	10556	1	1	MR2
SRR9864678	5ht	801397	9881	5	5	DR6
SRR9864679	5ht	691021	10666	4	4	MR1
SRR9864681	5ht	1.43695e+06	9743	9	9	cDR
SRR9864682	5ht	1.58995e+06	10593	5	5	DR6
SRR9864684	5ht	1.4233e+06	11154	0	0	DR4
SRR9864685	5ht	405802	8652	9	9	cDR
SRR9864687	5ht	1.53234e+06	10713	4	4	MR1
SRR9864688	5ht	1.19779e+06	10689	5	5	DR6
SRR9864689	5ht	1.20409e+06	10912	3	3	MR4
SRR9864690	5ht	1.00518e+06	10554	3	3	MR4
SRR9864691	5ht	1.16091e+06	10771	0	0	DR4
SRR9864692	5ht	1.5038e+06	11246	2	2	DR2
SRR9864693	5ht	1.02158e+06	10887	4	4	MR1
SRR9864694	5ht	953408	10689	5	5	DR6
SRR9864696	5ht	995949	9450	5	5	DR6
SRR9864699	5ht	916882	10305	9	9	cDR
SRR9864700	5ht	1.18475e+06	11409	4	4	MR1
SRR9864701	5ht	1.38281e+06	10396	0	0	DR4
SRR9864702	5ht	1.38194e+06	10690	7	7	DR3
SRR9864704	5ht	892392	11126	0	0	DR4
SRR9864705	5ht	996554	10734	5	5	DR6
SRR9864706	5ht	1.0555e+06	10727	4	4	MR1
SRR9864707	5ht	1.09768e+06	10820	3	3	MR4
SRR9864708	5ht	737634	9909	3	3	MR4
SRR9864709	5ht	807974	10755	8	8	DR1
SRR9864710	5ht	1.40352e+06	11550	0	0	DR4
SRR9864711	5ht	1.22929e+06	10783	3	3	MR4
SRR9864713	5ht	600383	10552	3	3	MR4
SRR9864717	5ht	1.00793e+06	11063	4	4	MR1
SRR9864718	5ht	618778	10664	4	4	MR1
SRR9864719	5ht	1.30753e+06	10270	5	5	DR6
SRR9864722	5ht	1.05113e+06	10797	4	4	MR1
SRR9864723	5ht	1.25943e+06	11244	4	4	MR1
SRR9864724	5ht	607637	9803	5	5	DR6
SRR9864727	5ht	816595	10762	1	1	MR2
SRR9864729	5ht	1.01137e+06	10728	5	5	DR6
SRR9864730	5ht	1.38225e+06	10678	0	0	DR4
SRR9864731	5ht	1.20783e+06	10363	8	8	DR1
SRR9864733	5ht	1.14752e+06	11152	4	4	MR1
SRR9864736	5ht	1.5054e+06	11297	0	0	DR4
SRR9864737	5ht	1.0495e+06	10660	0	0	DR4
SRR9864738	5ht	672809	9321	5	5	DR6
SRR9864739	5ht	1.09166e+06	10593	1	1	MR2
SRR9864740	5ht	1.06839e+06	10684	1	1	MR2
SRR9864743	5ht	1.26977e+06	10446	1	1	MR2
SRR9864744	5ht	1.13636e+06	11155	5	5	DR6
SRR9864747	5ht	2.15589e+06	12195	2	2	DR2
SRR9864748	5ht	1.29322e+06	11037	4	4	MR1
SRR9864749	5ht	467014	8774	0	0	DR4
SRR9864753	5ht	937338	10181	5	5	DR6
SRR9864754	5ht	1.03551e+06	11457	5	5	DR6
SRR9864755	5ht	1.24729e+06	11164	3	3	MR4
SRR9864756	5ht	1.20565e+06	10330	1	1	MR2
SRR9864758	5ht	466466	8303	8	8	DR1
SRR9864760	5ht	795220	9727	3	3	MR4
SRR9864762	5ht	1.17669e+06	10189	3	3	MR4
SRR9864764	5ht	722152	10669	4	4	MR1
SRR9864765	5ht	1.14563e+06	10597	3	3	MR4
SRR9864766	5ht	1.15516e+06	10877	0	0	DR4
SRR9864767	5ht	1250427	10684	4	4	MR1
SRR9864769	5ht	931491	9053	10	10	MR3
SRR9864771	5ht	1.20995e+06	11450	0	0	DR4
SRR9864773	5ht	704391	10753	3	3	MR4
SRR9864781	5ht	992746	10552	3	3	MR4
SRR9864782	5ht	628422	9960	1	1	MR2
SRR9864783	5ht	1.02898e+06	10983	3	3	MR4
SRR9864784	5ht	1.68251e+06	11458	0	0	DR4
SRR9864786	5ht	1.13451e+06	10639	1	1	MR2
SRR9864788	5ht	823752	10336	0	0	DR4
SRR9864789	5ht	983639	9562	1	1	MR2
SRR9864791	5ht	1.15221e+06	10591	10	10	MR3
SRR9864793	5ht	1.05278e+06	10952	3	3	MR4
SRR9864794	5ht	1.1093e+06	10541	7	7	DR3
SRR9864795	5ht	1.34137e+06	10813	1	1	MR2
SRR9864796	5ht	1.12394e+06	10780	1	1	MR2
SRR9864798	5ht	909235	10970	0	0	DR4
SRR9864799	5ht	787710	10284	1	1	MR2
SRR9864800	5ht	1028515	10948	3	3	MR4
SRR9864801	5ht	1.28212e+06	10633	1	1	MR2
SRR9864802	5ht	1.16252e+06	11410	2	2	DR2
SRR9864803	5ht	1.0343e+06	10484	5	5	DR6
SRR9864804	5ht	1.05768e+06	10998	4	4	MR1
SRR9864807	5ht	1.44901e+06	11522	0	0	DR4
SRR9864809	5ht	636816	10328	0	0	DR4
SRR9864810	5ht	883960	11137	3	3	MR4
SRR9864812	5ht	958850	10879	2	2	DR2
SRR9864813	5ht	482131	9370	9	9	cDR
SRR9864815	5ht	964612	11484	0	0	DR4
SRR9864816	5ht	787714	10685	5	5	DR6
SRR9864819	5ht	654876	10644	3	3	MR4
SRR9864820	5ht	396282	9669	1	1	MR2
SRR9864821	5ht	1.01379e+06	10672	5	5	DR6
SRR9864823	5ht	828485	10490	5	5	DR6
SRR9864825	5ht	707942	9760	3	3	MR4
SRR9864826	5ht	594631	10482	0	0	DR4
SRR9864827	5ht	506186	9811	1	1	MR2
SRR9864828	5ht	594947	9914	9	9	cDR
SRR9864829	5ht	762404	10609	0	0	DR4
SRR9864830	5ht	966366	10973	2	2	DR2
SRR9864831	5ht	903815	10175	9	9	cDR
SRR9864832	5ht	487182	9751	5	5	DR6
SRR9864833	5ht	709255	9815	1	1	MR2
SRR9864834	5ht	1.31147e+06	11171	4	4	MR1
SRR9864843	5ht	653275	9583	5	5	DR6
SRR9864844	5ht	1.39251e+06	11126	4	4	MR1
SRR9864846	5ht	858768	11166	0	0	DR4
SRR9864848	5ht	1.16941e+06	11757	3	3	MR4
SRR9864849	5ht	951902	11025	0	0	DR4
SRR9864851	5ht	826309	10576	5	5	DR6
SRR9864852	5ht	802367	10543	0	0	DR4
SRR9864853	5ht	1.39701e+06	11695	4	4	MR1
SRR9864855	5ht	716309	9663	3	3	MR4
SRR9864856	5ht	716632	10123	8	8	DR1
SRR9864857	5ht	676103	10466	1	1	MR2
SRR9864860	5ht	420808	9626	1	1	MR2
SRR9864861	5ht	987968	9938	1	1	MR2
SRR9864864	5ht	1.16312e+06	8901	5	5	DR6
SRR9864867	5ht	953575	10891	0	0	DR4
SRR9864868	5ht	840044	10823	4	4	MR1
SRR9864871	5ht	909467	8237	4	4	MR1
SRR9864872	5ht	406821	10114	5	5	DR6
SRR9864873	5ht	799315	10592	5	5	DR6
SRR9864874	5ht	978238	11285	0	0	DR4
SRR9864877	5ht	621373	10189	5	5	DR6
SRR9864878	5ht	411030	9893	5	5	DR6
SRR9864883	5ht	866507	10514	1	1	MR2
SRR9864884	5ht	339532	9442	9	9	cDR
SRR9864885	5ht	791900	11055	0	0	DR4
SRR9864886	5ht	729636	10264	9	9	cDR
SRR9864890	5ht	555087	10597	4	4	MR1
SRR9864891	5ht	1.72429e+06	11808	0	0	DR4
SRR9864892	5ht	887280	10072	8	8	DR1
SRR9864894	5ht	910816	10428	3	3	MR4
SRR9864895	5ht	840120	10004	3	3	MR4
SRR9864896	5ht	402104	8384	10	10	MR3
SRR9864899	5ht	380257	9716	1	1	MR2
SRR9864900	5ht	959072	10806	5	5	DR6
SRR9864901	5ht	259014	8245	1	1	MR2
SRR9864902	5ht	504909	9741	3	3	MR4

## Sheet: Fig1B&C_5-HT_Nrxn_count.data
	SRR9863372	SRR9863383	SRR9863384	SRR9863389	SRR9863390	SRR9863396	SRR9863398	SRR9863399	SRR9863403	SRR9863406	SRR9863407	SRR9863412	SRR9863418	SRR9863424	SRR9863425	SRR9863426	SRR9863427	SRR9863430	SRR9863431	SRR9863432	SRR9863433	SRR9863436	SRR9863437	SRR9863438	SRR9863441	SRR9863442	SRR9863443	SRR9863444	SRR9863445	SRR9863448	SRR9863449	SRR9863452	SRR9863454	SRR9863455	SRR9863457	SRR9863458	SRR9863459	SRR9863460	SRR9863461	SRR9863463	SRR9863464	SRR9863466	SRR9863469	SRR9863470	SRR9863471	SRR9863472	SRR9863474	SRR9863475	SRR9863478
aNrxn1	0.820272	0.649853	0.214772	1.46942	1.00835	0.829479	0.623781	0.947562	0.969577	0.769814	0.45911	0.995279	1.00322	1.40598	0.470201	0.474542	0.668397	0.792144	0.853223	0.245383	0.334568	0.472659	0.624639	0.87639	0.541939	0.557335	1.06787	0.296673	0.491903	0.648081	0.365367	0.388974	0.337802	0.0814585	0.55678	0.762244	0.912237	0.734763	0.918381	0.258463	0.568693	0.290393	0.644893	0.551432	0.606205	0.841593	0.209809	0.392344	0.430714
aNrxn2	0.0608799	0	0	0	0	0.283145	0.0527092	0.0220113	0	0.0394928	0.0382904	0.272328	0	0	0	0.494322	0.0201844	0.425236	0.113904	0.2816	0.253296	0.100143	0.112147	0.104429	0.217197	0	0	0.259167	0.339211	0.26193	0	0.629159	0.0259001	0	0.275454	0.0220309	0	0.111777	0.117927	0	0	0.334697	0.249716	0.173012	0	0.0627689	0	0.0320534	0.130951
aNrxn3	0.0999737	0.0747345	0	0.018359	0.00877689	0	0.135381	0	0.021733	0.317257	0.0284421	0.122209	0.441856	0	0	0.236371	0.175549	0.334295	0.15544	0.403663	0.171414	0.0880328	0.0824448	0.685074	0	0.213449	0	0.0383541	0.105268	0.184204	0.141379	0.562774	0	0.0911896	0.379225	0.149962	0.627723	0	0.479908	0	0.1784	0.40468	0.365014	0.0248722	0.0569166	0.403775	0.329711	0	0.0732867
bNrxn1	0	0.0294087	0	0	0.109288	0.0505095	0	0.274508	0.146859	0	0	0.0516777	0	0.0446124	0.129583	0	0.35556	0.262755	0.266408	0.0232952	0	0.483656	0.169029	0	0.0322565	0.491057	0.710293	0.523629	0.44886	0.269726	0.219587	0.0872647	0.21423	0.296228	0	0.440426	0.384424	0.652362	0.321198	0.482107	0.772753	0.550066	0.780206	0.651919	0.488105	0	0.856863	0.569179	0.303315
bNrxn2	0.346628	0.329289	0.437086	0.109575	0.111262	0.0487696	0.385066	0.0977271	0.314161	0.104397	0.32178	0.0673549	0.076809	0.161171	0.285662	0.10713	0.0537033	0	0.152305	0	0	0.129791	0	0.133003	0.387938	0.0741616	0.126721	0.0308	0.234379	0.0245549	0.181247	0	0.17095	0.216906	0.0096472	0.15097	0.0735396	0.261946	0.598912	0.342748	0.0649781	0	0.0513101	0.0559679	0.301145	0.00244157	0.173992	0.120071	0.240763
bNrxn3	0.23441	0.179247	0	0.130119	0	0.080197	0.48867	0	0	0.0366554	0	0.343399	0.556053	0	0	0.209563	0	0.203252	0.356093	0.678556	0.312013	0.144292	0.124869	1.53128	0.11657	0.399633	0	0.27612	0.290318	0.639176	0.640928	0.0569654	0.0537672	0.236637	0.231389	0.144903	1.5412	0	0.390412	0	0.0987182	0.458316	1.29286	0.363895	0.308893	1.25089	0.38314	0	0.565535
[truncated: 896 more columns]

## Sheet: Fig1D
Figure 1 Nrxn expression in the raphe nuclei and confirmation of Nrxn deletion in Fev/RFP/NrxnTKO mice.
Figure 1D, Single-cell qPCRRs
Tph2 (fold)			Nrxn1 (fold)			Nrxn2 (fold)			Nrxn3 (fold)
WT	TKO		WT	TKO		WT	TKO		WT	TKO
1.66997	1.51007		0.0742458	0.0697483		16.0854	0		0	0
1.29762	1.58949		0.0786534	6.79486e-05		0.00160199	0		0.00081001	0
0.615836	0.62797		0	0		0	0		0	0
1.49145	1.51196		0.128314	5.75172e-05		0.00586657	0		0	0
1.53972	1.5857		0.178711	0		0.00192648	0		11.7226	0
3.53465	3.3094		0	0		6.79905	0		2.6419	0
0.410817	1.6778		0.307755	0		0.00230716	0.10333		0.00140188	0
0.407979	0.844734		2.38643	0		0.00346083	0.0137477		0.0105734	0.0114111
3.4261	3.47393		9.64548	0.00110622		0.0531176	0		0.0919235	0
0.830222	0.435749		4.95832	0.566384		0	0		0	0
0.815959	0.423833		0	0		0	0		0	0
0.865478	0.830222		0.600757	0		0.00326281	0		0	0.0219684
0.57697	1.64897		0	0		0	0		0	0
0.841811	0.431242		0.661977	0		0.013988	0		0	0
0.830222	0.413675		0.40328	0		0.00472763	0		1.50168	0
0.416552	0.835996		0.00948493	0		0	0		0	0
1.15394	0.835996		0.588393	0		0.00641352	0		0	0
0.212652	1.63192		1.66423	0		0.0130513	0		0	0.0863642
0.415111	0.833104		0.158753	0		0.000702766	0		7.02051	0
0.824487	0.571002		0.607035	0		0	0		0	0
0.206837	0.815959		0.324177	8.37693e-06		0	0		0	0
0.210453	0.774624		0.150711	0		0.00358287	0		0.00724689	0
0.405161			0.0732947			0.00151164			0.00129896

## Sheet: Figure 1-Figure Supplement 1
Figure 1-Figure Supplement 1. Validation of the Fev/RFP/NrxnTKO mouse line.
	FAM/VIC Ratio			FAM/VIC Ratio
	Nrxn2			Nrxn3
	Cntl	TKO		Cntl	TKO
	0.105307	0.266061		43.3458	0.850982
	576.365	5.42773		14354	4.65301
	0.035291	0.549059		250.322	1.12179
