# Supplementary material for: Neurexins in serotonergic neurons regulate neuronal survival, serotonin transmission, and complex mouse behaviors
Source: eLife journal article supplement (doi:10.7554/elife.85058), 2023-01-25
Supplement: fig3-data1 [file Figure 3 Source Data File.xlsx]

## Sheet: Figure 3I & M
Figure 3 The absence of Nrxns in 5-HT neurons decreases 5-HT fiber density, neuron number, and release sites.
Figure 3I	Cntl	TKO		Figure 3M
NAcc	6.5165	7.261		DRN
	4.5105	6.12733		P7_Cntl	P7_TKO	8W_Cntl	8W_TKO	14M_Cntl	14M_TKO
	5.53057	3.73517		0.628571	0.592905	0.673184	0.379407	0.573055	0.394024
	6.4935	5.86125		0.571739	0.646318	0.603622	0.312358	0.655904	0.518392
NAcSh	7.412	7.39033		0.555442	0.5201	0.568158	0.471137		0.367578
	4.34967	6.65017		0.551737	0.542062	0.566906	0.493803
	7.631	4.2635
	7.68483	11.2766		MRN
dCA1	6.72833	3.6605		P7_Cntl	P7_TKO	8W_Cntl	8W_TKO	14M_Cntl	14M_TKO
	5.959	3.12633		0.585034	0.702186	0.703366	0.391578	0.610111	0.409712
	4.72771	3.587		0.571739	0.533139	0.645765	0.367862	0.71756	0.481121
	6.28033	3.7546		0.564826	0.461449	0.644206	0.519695		0.330775
dCA2	6.53067	2.94383		0.619052	0.499992	0.636579	0.502063
	5.914	2.2125
	6.97314	3.82167
	5.69067	2.07575
dCA3	7.08917	3.10067
	8.22417	2.39567
	9.48271	3.85017
	10.196	3.674
vCA1	6.79933	4.3815
	5.88683	2.69017
	5.86957	3.188
	6.07917	3.5146
DRN	24.2987	16.1452
	21.8385	20.957
	23.7966	15.7845
	33.0353	17.5216
MRN	18.0542	17.5378
	18.8672	17.6728
	20.6737	13.4282
	20.8295	13.8154

## Sheet: Figure 3O
Figure 3 The absence of Nrxns in 5-HT neurons decreases 5-HT fiber density, neuron number, and release sites.
Figure 3O
	axon	um	puncta of RIM	density				axon	um	puncta of RIM	density
WT1-1	Polyline1	52.0857	9	0.172792			KO1-1	Polyline1	38.3041	12	0.313282
WT1-2	Polyline1	35.3964	7	0.19776				Polyline2	14.9578	4	0.267419
	Polyline2	24.5588	6	0.244312				Polyline3	14.0735	4	0.284222
	Polyline3	26.4422	5	0.189092			KO1-2	Polyline1	26.6543	17	0.637795
	Polyline4	42.2848	11	0.260141			KO1-3	Polyline1	32.046	5	0.156026
WT1-3	Polyline1	18.8664	9	0.477039				Polyline2	25.1114	1	0.0398226
	Polyline2	47.4753	10	0.210636			KO1-4	Polyline1	31.4279	2	0.0636376
	Polyline3	28.1798	11	0.390351				Polyline2	36.4695	8	0.219361
WT1-4	Polyline1	39.0957	10	0.255782			KO1-5	Polyline1	23.6528	4	0.169113
	Polyline2	40.9902	6	0.146376				Polyline2	18.0609	3	0.166104
WT1-5	Polyline1	32.1511	15	0.466547			KO1-6	Polyline1	56.1393	7	0.12469
	Polyline2	29.4476	5	0.169793			KO1-7	Polyline1	57.564	6	0.104232
	Polyline3	39.9725	6	0.150103				Polyline2	33.9521	2	0.0589066
WT1-6	Polyline1	28.3002	13	0.45936				Polyline3	23.1906	4	0.172484
	Polyline2	70.8118	24	0.338927			KO1-8	Polyline1	52.526	5	0.0951909
	Polyline3	21.3486	2	0.093683			KO1-9	Polyline1	59.2886	7	0.118066
	Polyline4	12.9568	3	0.231539				Polyline2	55.7786	6	0.107568
WT1-7	Polyline1	56.0471	13	0.231948			KO1-10	Polyline1	53.2509	15	0.281685
	Polyline2	36.3127	6	0.165231				Polyline2	22.3855	8	0.357374
WT1-8	Polyline1	37.3003	15	0.402142			KO1-11	Polyline1	51.362	28	0.54515
	Polyline2	35.852	6	0.167355			KO1-12	Polyline1	40.2292	5	0.124288
	Polyline3	36.0101	16	0.44432			KO1-13	Polyline1	48.871	14	0.286469
WT1-9	Polyline1	80.4489	32	0.397768				Polyline2	36.2577	4	0.110321
WT1-10	Polyline1	42.449	33	0.777404			KO1-14	Polyline1	69.5689	13	0.186865
	Polyline2	27.7735	16	0.576088			KO1-15	Polyline1	28.5377	10	0.350414
WT1-11	Polyline1	38.0955	28	0.734995				Polyline2	57.072	11	0.192739
WT1-12	Polyline1	56.9321	36	0.632332				Polyline3	17.9734	5	0.278189
WTFeVT1M1	Polyline1	38.7675	18	0.464306			KO1-16	Polyline1	71.9254	31	0.431002
	Polyline2	40.7684	17	0.41699			KO NFT7271-3 1	Polyline1	41.3794	19	0.459166
	Polyline3	27.0001	12	0.444443				Polyline2	32.4556	7	0.215679
WTFeVT1M2	Polyline1	14.8127	9	0.607585				Polyline3	25.2069	12	0.476059
	Polyline2	15.9953	13	0.812738			KO NFT7271-3 2	Polyline1	43.7878	11	0.251212
	Polyline3	29.2814	13	0.443969				Polyline2	14.2112	4	0.281468
	Polyline4	39.2437	29	0.738972				Polyline3	20.4249	5	0.244799
WTFeVT1M3	Polyline1	25.5688	19	0.743094			KO NFT7271-3 3	Polyline1	35.5124	5	0.140796
	Polyline2	27.3231	15	0.548987				Polyline2	20.8437	10	0.479761
	Polyline3	12.6918	4	0.315163			KO NFT7271-3 4	Polyline1	12.1654	1	0.0822006
	Polyline4	17.8721	6	0.335718				Polyline2	16.1012	2	0.124214
WTFeVT1M4	Polyline1	25.0918	9	0.358683			KO NFT7271-3 5	Polyline1	27.1504	7	0.257823
	Line2	5.4384	3	0.551633				Polyline2	17.3616	2	0.115197
	Polyline3	11.6902	4	0.342166				Polyline3	35.2119	5	0.141998
	Polyline4	12.4974	5	0.400083				Polyline4	34.6652	10	0.288474
WTFeVT1M5	Polyline1	27.0696	15	0.554126			KO NFT7271-3 6	Polyline1	27.3464	2	0.0731357
	Polyline2	21.4031	6	0.280333				Polyline2	25.5798	8	0.312747
WTFeVT1M6	Polyline1	39.9062	22	0.551293				Polyline3	27.0646	1	0.0369486
	Polyline2	39.3008	17	0.432561				Polyline4	17.5263	2	0.114114
	Polyline3	42.7971	24	0.560785			KO NFT7271-3 7	Polyline1	22.5398	9	0.399293
WTFeVT1M7	Polyline1	27.4627	3	0.109239				Polyline2	32.9082	15	0.455813
	Polyline2	38.3186	12	0.313163			KO NFT7271-3 8	Polyline1	30.9268	6	0.194007
	Polyline3	28.1425	6	0.2132				Polyline2	33.1267	11	0.332058
WTFeVT1M8	Polyline1	33.4862	29	0.866028			KO NFT7271-3 9	Polyline1	21.6343	3	0.138669
	Polyline2	27.5349	13	0.472128			KO NFT7271-3 10	Polyline1	12.4119	3	0.241704
	Polyline3	26.5462	15	0.565052				Polyline2	12.1111	6	0.495413
	Polyline4	33.206	25	0.752877				Polyline3	11.5731	6	0.518442
WTFeVT1M9	Polyline1	81.8617	22	0.268746				Polyline4	13.9638	6	0.429681
	Polyline2	17.3377	7	0.403745			KO NFT7271-3 11	Polyline1	36.6631	10	0.272754
WTFeVT1M10	Polyline1	28.3352	18	0.635252				Polyline2	29.9134	9	0.300869
	Polyline2	41.0544	24	0.584591				Polyline3	24.2169	13	0.536816
WTFeVT1M11	Polyline1	35.1006	18	0.512812			KO NFT7271-3 12	Polyline1	49.6555	4	0.080555
WTFeVT1M12	Polyline1	58.685	26	0.443043			KO NFT7271-3 13	Polyline1	37.8116	6	0.158682
WTFeVT4M1	Polyline1	73.0514	20	0.27378			KO NFT7271-4 1	Polyline1	33.1107	12	0.362421
	Polyline2	21.1678	6	0.283449				Polyline2	16.7438	7	0.418066
WTFeVT4M2	Polyline1	32.7646	13	0.39677				Polyline3	20.1175	5	0.24854
	Polyline2	17.1418	11	0.641707			KO NFT7271-4 2	Polyline1	36.3288	5	0.137632
	Polyline3	13.7149	10	0.729132			KO NFT7271-4 3	Line1	6.34949	2	0.314986
WTFeVT4M3	Polyline1	64.3939	23	0.357177				Polyline2	10.3614	3	0.289536
WTFeVT4M4	Polyline1	44.2968	13	0.293475				Polyline3	7.48199	2	0.267308
WTFeVT4M5	Polyline1	21.3744	14	0.654988			KO NFT7271-4 4	Polyline1	46.5337	20	0.429796
	Polyline2	23.2316	9	0.387404			KO NFT7271-4 5	Polyline1	39.9029	19	0.476155
	Polyline3	20.7338	8	0.385843			KO NFT7271-4 6	Polyline1	43.8023	9	0.205469
WTFeVT4M6	Polyline1	28.7539	10	0.347779				Polyline2	16.3681	4	0.244377
	Polyline2	39.0173	7	0.179407			KO NFT7271-4 7	Polyline1	47.0082	11	0.234002
	Polyline3	24.5282	5	0.203847				Polyline2	42.2795	9	0.212869
	Polyline4	13.9349	2	0.143525			KO NFT7271-4 8	Polyline1	17.5326	6	0.34222
WTFeVT4M7	Polyline1	38.7764	12	0.309466				Polyline2	20.555	3	0.14595
WTFeVT4M8	Polyline1	26.4157	12	0.454276			KO NFT7271-4 9	Polyline1	28.3775	6	0.211435
WTFeVT4M9	Polyline1	24.1355	10	0.414327			KO NFT7271-4 10	Polyline1	29.0002	12	0.41379
	Polyline2	20.7634	5	0.240808				Polyline2	14.7852	1	0.0676353
	Polyline3	14.3903	7	0.486439
	Polyline4	26.4918	10	0.377476
WTFeVT4M10	Polyline1	46.9169	21	0.4476

## Sheet: Figure 3-Figure Supplement 1
Figure 3-Figure Supplement 1. The absence of Nrxns in 5-HT neurons reduces SERT expression.
	Brainstem		Hippocampus
	Cntl	TKO	Cntl	TKO
	3.52538	2.31373	1.12418	1.0506
	2.74548	2.05453	1.46717	0.943459
	5.72679	1.58338	1.28946	0.843312
	4.34624	1.82235	1.29749	1.13249
	5.72884	1.63652	1.53293	0.967468
	2.93871	2.00387	1.4384	0.60788
