# Supplementary material for: Neurexins in serotonergic neurons regulate neuronal survival, serotonin transmission, and complex mouse behaviors
Source: eLife journal article supplement (doi:10.7554/elife.85058), 2023-01-25

## Brainstem

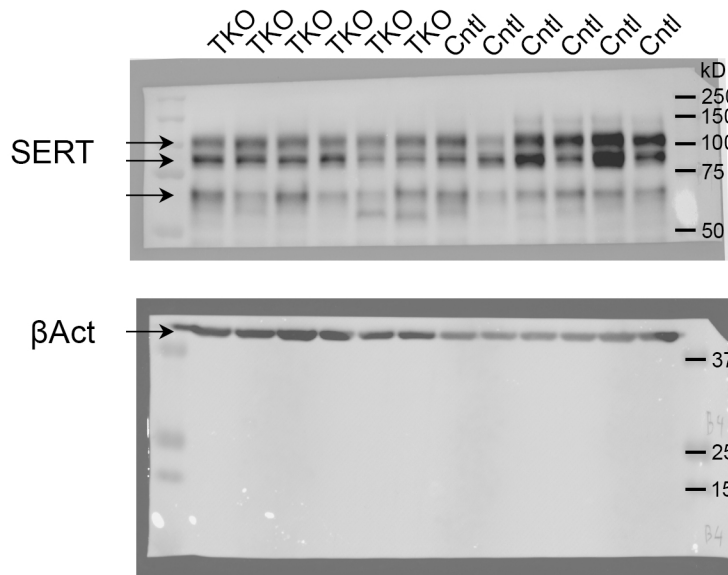

## Hippocampus

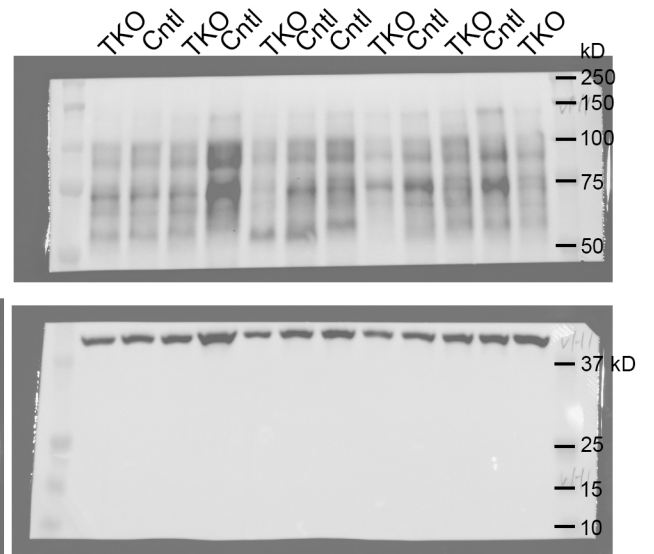

Supplement: fig3-figsupp1-data1 [file elife-85058-fig3-figsupp1-data1-v1.pdf]
