# Supplementary material for: Neurexins in serotonergic neurons regulate neuronal survival, serotonin transmission, and complex mouse behaviors
Source: eLife. 2023 Jan 25;12:e85058. doi: 10.7554/eLife.85058 (PMC9876567; doi:10.7554/eLife.85058)
Supplement: Figure 2—source data 1. [file elife-85058-fig2-data1.xlsx]

## Sheet: Sheet1
Figure 2 The lack of Nrxns in 5-HT neurons reduces evoked 5-HT release in the dorsal raphe nucleus and hippocampus.
Dorsal raphe nucleus
Figure 2E	Stimulation strength	Cntl						Fev/RFP/NrxnTKO
	150 μA	142.514	248.33	304.164	260.033	203.927	486.685	114.326	101.639	241.442	144.458	90.9385	106.416
	250 μA	286.266	379.019	392.71	361.331	395.856	488.847	132.402	150.036	320.353	318.915	137.544	154.032
Figure 2F	Application	Cntl						Fev/RFP/NrxnTKO
	aCSF	0.391319	1.20792	0.861503	1.83954	0.945863	0.753846	0.681445	1.01592	0.5733	2.32571	0.535257	0.868366
	FLX	0.844914	1.57705	1.56242	2.34444	1.56191	1.33405	0.85073	1.36471	1.33138	3.25125	0.843494	1.28587
Hippocampus
Figure 2I	Stimulation strength	Cntl					Fev/RFP/NrxnTKO
	150 μA	396.97	388.132	386.233	510.479	281.099	329.712	155.61	178.988	96.8425	150.111	281.582
	250 μA	744.44	387.698	467.663	671.628	524.527	326.496	162.757	200.825	153.126	165.314	302.698
Figure 2J	Application	Cntl					Fev/RFP/NrxnTKO
	aCSF	1.25243	0.855229	0.470073	1.31047	1.1118	0.205009	1.08687	1.3207	1.42944	0.486914	1.47107
	FLX	1.5087	0.989396	0.68108	1.61741	1.2241	0.601624	1.18768	1.33059	1.36976	0.376013	2.82012
