# Supplementary material for: Neurexins in serotonergic neurons regulate neuronal survival, serotonin transmission, and complex mouse behaviors
Source: eLife. 2023 Jan 25;12:e85058. doi: 10.7554/eLife.85058 (PMC9876567; doi:10.7554/eLife.85058)
Supplement: Figure 4—source data 1. [file elife-85058-fig4-data1.xlsx]

## Sheet: Fig 4
Figure 4 The absence of Nrxns in 5-HT neurons impairs social behavior.
Direct interaction test
Figure 4B	Investigation (s)
		Ctnl													Fev/RFP/NrxnTKO
	Trial 1	140.74	135.3	81.97	67.01	118.72	68.94	28.15	12.45	110.21	129.32	52.83	41.37	44.2	30	68.45	34.27	45.6	53.42	11.93	45.75	18.68	67.34	132.38	67.17	32.54	41.2
	Trial 2	92.62	47.94	56.2	49.62	34.77	54.26	9.3	11.27	45.57	56.8	94.21	48.55	14.3	64.65	15.12	40.39	34.34	67.83	12.07	80.61	26.34	65.86	75.74	70.14	10.99	23.53
Figure 4C	Difference score
	Ctnl	Fev/RFP/NrxnTKO
	48.12	-34.65
	87.36	53.33
	25.77	-6.12
	17.39	11.26
	83.95	-14.41
	14.68	-0.14
	18.85	-34.86
	1.18	-7.66
	64.64	1.48
	72.52	56.64
	-41.38	-2.97
	-7.18	21.55
	29.9	17.67
Forced swim test
Figure 4D	Immobile (s)			# of episodes
	Ctnl	Fev/RFP/NrxnTKO		Ctnl	Fev/RFP/NrxnTKO
	132.49	153.15		10	6
	139.1	147.9		7	9
	138.92	152.68		12	10
	133.68	202.38		14	5
	184.15	175.41		5	9
	146.43	182.4		11	7
	123.24	182.09		8	8
	171.48	191.53		8	7
	147.97	192.49		14	9
	184.1	158		9	11
	183.1	192.64		5	7
	189.76	192.45		11	10
Tail suspension test
Figure 4E	Immobile (s)			# of episodes
	Ctnl	Fev/RFP/NrxnTKO		Ctnl	Fev/RFP/NrxnTKO
	132.27	143.89		8	8
	169.46	136.18		10	13
	193.73	132.94		7	15
	165.59	104.3		14	15
	125.21	134.57		10	12
	187.32	148.44		6	10
	139.88	163.81		9	9
	179.67	173.54		10	8
	161.58	150.99		12	11
	145.03	178		10	11
	161.56	173.62		11	12
	156.16	164.54		14	9

## Sheet: Figure 4-Figure Supplement 1
Figure 4-Figure Supplement 1 5-HT neuron-specific Nrxn TKO does not alter basic behavioral activities
Figure 4 Sup1 A	Horizontal locomotor activity (# of beam breaks/5 min)
	Time (min)	Ctnl												Fev/RFP/NrxnTKO
	5	363	398	455	242	304	301	357	316	418	525	401	394	360	544	327	322	421	445	396	416	302	331	264	512
	10	299	250	277	175	217	217	311	241	293	320	380	232	263	327	235	233	176	269	246	268	227	232	176	325
	15	163	222	349	179	138	191	236	175	267	320	345	186	181	343	201	192	165	263	202	215	137	155	213	212
	20	190	189	275	158	174	103	172	157	229	355	278	168	204	274	171	73	212	303	192	331	174	183	153	236
	25	167	242	252	189	65	157	198	269	276	301	274	189	130	313	209	103	107	313	143	162	173	154	185	218
	30	144	232	293	104	133	129	185	151	199	330	331	37	174	275	170	169	104	248	113	238	145	197	166	291
	35	75	219	293	164	66	98	82	183	126	379	261	131	132	228	160	73	50	231	94	320	132	167	105	215
	40	174	117	323	157	53	134	118	170	208	393	606	108	85	268	133	72	61	165	105	51	114	267	428	150
	45	184	248	205	55	77	0	8	65	252	360	252	69	82	217	104	115	85	198	135	88	110	193	158	137
	50	155	155	265	130	91	80	140	86	205	334	270	77	125	272	238	117	82	222	60	192	145	155	128	136
	55	28	201	143	121	58	54	172	121	145	209	294	40	86	255	152	98	69	162	21	268	134	142	145	128
	60	143	211	194	113	30	141	150	99	191	328	265	101	46	281	125	75	31	244	45	207	153	212	94	107
	65	104	150	298	122	58	45	202	139	131	347	196	103	77	322	119	87	4	153	14	224	105	90	78	77
	70	125	133	372	119	61	86	46	156	154	124	177	124	88	248	163	10	81	178	48	32	109	169	143	121
	75	64	134	148	124	98	45	98	117	159	350	194	84	99	171	132	19	22	186	89	111	125	86	159	152
	80	132	129	212	111	102	51	67	157	149	322	208	38	58	119	115	49	25	136	69	142	93	137	81	106
	85	59	132	145	71	57	61	78	122	92	68	167	43	80	181	76	9	0	159	96	191	66	168	112	78
	90	58	114	114	60	55	72	83	78	44	217	164	4	76	197	65	17	0	132	24	49	111	141	93	36
Figure 4 Sup1 B
	Latency to fall (s)
	Trial	Ctnl																Fev/RFP/NrxnTKO
	1	147	88	78	53	136	119	144	80	118	137	149	116	72	82	117	56	168	84	66	143	157	158	81	139	51	54	79	67	116
	2	112	224	108	144	197	187	199	259	228	150	182	120	150	177	199	146	203	123	212	250	172	200	201	195	231	146	150	180	16
	3	104	266	168	231	212	165	213	156	233	146	179	129	173	172	203	205	191	144	272	232	203	170	174	190	198	157	178	171	143
	4	150	140	154	241	166	207	253	177	252	203	156	171	196	175	212	202	203	193	259	277	189	204	211	199	271	175	140	179	155
	5	164	178	176	300	173	219	272	264	206	196	148	159	194	209	214	188	230	147	300	285	178	233	250	160	258	197	137	224	180
Figure 4 Sup1 C
	Open field
		Center (s)			Distance (cm)
		Cntl	Fev/RFP/NrxnTKO		Cntl	Fev/RFP/NrxnTKO
		84.5161	222.418		3363.29	3473.34
		137.468	173.003		3441.95	3501.17
		96.8615	84.8164		3080.1	4794.49
		113.578	177.14		3618.76	3457.22
		201.431	110.942		3897.74	4146.19
		116.314	113.578		3707.59	3626.82
		217.747	103.435		4031.7	3786.1
		131.228	24.3238		4345.66	4623.54
		63.1285	101.433		3019.18	3084.99
		109.04	123.387		3935.06	3184.62
		146.01	144.275		3500.54	3155.7
		90.2884	117.882		4368.06	3212.32
Figure 4 Sup1 D
	Elevated plus-maze
		Open arm (s)			Total arm entries
		Cntl	Fev/RFP/NrxnTKO		Cntl	Fev/RFP/NrxnTKO
		21.9	4.67		31	30
		0.09	37.59		26	40
		20.2	4.11		47	35
		7.08	27.81		51	32
		18.51	38.67		22	46
		16.45	31.33		20	25
		23.94	21.03		28	30
		19.32	40.63		34	41
		61.18	28.97		27	30
		0	15.57		53	32
		0.08	29.68		27	28
		10.79	5.34		36	50

## Sheet: Figure 4-Figure Supplement 2
Figure 4-Figure Supplement 2. Social behavior in the three-chamber social interaction test is preserved in Fev/RFP/NrxnTKO mice.
Figure 4 Sup2 B
	Investigation (s)
	Stimulus	Cntl													Fev/RFP/NrxnTKO
	Nonfamiliar	86.34	49.14	78.88	56.62	100.28	57.85	108.37	68.73	125.77	84.86	71.31	80.94	58.52
	Empty	11.4	57.73	13.54	26.51	12.27	31.57	9.28	28.12	14.68	17.07	31.74	11.36	16.33
	Nonfamiliar														86.81	43.69	94.83	74.71	95.42	53.8	92.97	66.39	87.84	58.81	19.64	41.83	17.85
	Empty														16.9	20.85	21.87	18.74	14.99	24.38	3.45	22.15	11.8	23.9	9.3	14.3	9.87
	Familiar	46.61	25.56	14.74	33.75	26	28.4	23.52	29.66	47.94	31.33	45.09	43.89	31.42
	Empty	12.31	16.2	12.72	14.3	15.56	7.66	14.43	8.01	13.58	12.49	3.29	6.18	6.71
	Familiar														36.99	20.49	29.18	30.31	33.86	17.17	52.47	36.15	34.82	58.81	19.64	41.83	17.85
	Empty														11.3	16.66	10.15	13.1	14.91	7.14	7.71	6.63	11.74	23.9	9.3	14.3	9.87
	Familiar	52.69	16.23	17.51	20.27	19.81	17.31	25.32	23.69	23.5	16.42	27.73	20.5	19.7
	Novel	29.25	33.84	30.94	63.73	36.68	24.13	52.15	22.71	44.29	49.73	34.77	59.13	34.11
	Familiar														30.19	14.73	28	33.98	18.32	10.67	26.71	29.5	15.96	32.14	18.12	14.93	27.85
	Novel														20.52	16.39	29.8	35.09	42.87	13.81	42.31	41.8	36.44	77.04	27.46	51.71	20.99
Figure 4 Sup2 C	Preference ratio
		Ctnl													Fev/RFP/NrxnTKO
	Day 1	0.7667	-0.08	0.707	0.3622	0.782	0.2939	0.8422	0.4193	0.791	0.6651	0.384	0.753846	0.563661	0.6741	0.3539	0.625193	0.59893	0.728467	0.376311	0.928438	0.499661	0.763147	0.665541	0.490383	0.578605	0.518092
	Day 2	0.5821	0.2241	0.0736	0.4048	0.2512	0.5752	0.2395	0.5747	0.5585	0.4299	0.864	0.753146	0.648046	0.532	0.1031	0.483855	0.396452	0.388559	0.412587	0.743769	0.690042	0.495704	0.422077	0.357291	0.490469	0.287879
	Day 3	-0.286	0.3517	0.2772	0.5174	0.2986	0.1646	0.3463	-0.021	0.3067	0.5036	0.1126	0.485119	0.267794	-0.191	0.0533	0.031142	0.016071	0.401209	0.128268	0.226021	0.172511	0.39084	0.411247	0.204914	0.551921	-0.14046

## Sheet: Figure 4-Figure Supplement 3
Figure 4-Figure Supplement 3. 5-HT neuron-specific Nrxn TKO mice display normal learning and memory and repetitive behaviors.
Figure 4 Sup3 B	Fear conditioning
		Freezing (%) (acquisition)
		Conditioned stimulus	Ctnl														Fev/RFP/NrxnTKO
		CS+1	14	17.7	0	0	0	0	6.3	20.7	0	0	0	0	0	0	0	0	0	3.7	0	3.7	6.7	0	0	3.7	0
		CS+2	36.3	52	0	8	12.7	0	0	30.3	0	0	3.7	9	0	8.3	0	4.7	15.3	35	20.3	20	21.7	15.7	0	18	0
		CS+3	17.7	12.7	54	59.7	39	29.7	55.3	57	21.3	0	30.3	31.3	10	39.3	11	18	30.3	32.3	54.7	44	75	33	49.7	51	12.3
		CS+4	49.3	39.3	80.7	86.3	51.7	87	73.3	39.7	33	61.7	59.7	32.3	7	53.7	36.3	34.3	75.3	58	42.7	28	82.7	57	90.7	30.3	29
		CS+5	71.7	29.7		34	22.3	51.3	67	43.3	28.3	39.7	58	37.7	21	28	10.3	28	14	57	45	36.3	85.3	54.3	80.7	43.3	11.3
Figure 4 Sup3 C		Freezing (%) (cued recall)
		Conditioned stimulus	Ctnl														Fev/RFP/NrxnTKO
		CS-	24	35.2	17.4	33.6	36.6	23	23.2667	34.8	37	16.1	29.9	37.5	15.4	26.4	32.6667	22.5333	19.6	25.8667	12.2667	31.3333	60.9	46.9	41.5	44.6	28.1
		CS+	73.7333	87.3333	57.8	61.6	84.4667	66.2667	66.7333	57.3	45.3	30.5	43.8	52.8	26.9	58.6	59.8	75.0667	76.0667	75.3333	31.6667	74.3333	70.9	55.1	61	84.6	47.7
Figure 4 Sup3 D		Freezing (%) (contextual recall)
		Cntl	Fev/RFP/NrxnTKO
		44.5	18.1
		36.8	14.4
		6.4	25.5
		20.5	35.3
		42.1	6.4
		25.2	16.8
		30.2	54.8
		19.3	22.3
		11.8	15
		5.4	33.9
		18	22.1
		23.3
		14.6
		37.6
	Object interaction test
Figure 4 Sup3 F		Investigation (s)
		Stimulus	Ctnl															Fev/RFP/NrxnTKO
		Nonfamiliar	19.64	13.54	21.88	19.95	13.17	3.69	10.32	26.31	23.79	6.75	14.68	18.92	8.58	8.78	5.01
		Nonfamiliar	16.51	21.7	19.44	13	4.38	4	11.49	18.2	15.29	13.98	13.2	4.98	8.9	8.22	3.79
		Nonfamiliar																12.14	12.93	24.18	21.72	13.11	24.75	12.46	11.23	14.37	7.11	6.28	9.03
		Nonfamiliar																19.89	18.48	11.65	13.98	12.03	13.18	14.84	8.32	16.76	6.78	12.61	3.41
		Familiar	10.77	8.18	7.83	15.11	14.79	2.19	12.41	14.13	9.39	5.89	10	6.85	3.3	7.3	6.47
		Familiar	9.07	6.06	6.6	19	5.24	4.79	8.39	9.31	9.18	11.66	10.24	6.75	4.78	5.77	4.55
		Familiar																13.76	12.74	13.68	7.87	4.31	4.84	8.62	11.68	6.26	4	9.66	5.89
		Familiar																8.97	11.7	10.96	11.38	5.53	6.27	5.44	5.66	6.95	3.6	5.45	4.16
		Familiar	6.34	8.08	5.34	20.44	7.45	5.96	6.91	8.91	6.97	7.33	8.96	5.68	4.04	5.67	6.01
		Novel	17.05	22.89	18.44	40.29	10.89	7.91	18.44	27.6	22.46	16.46	16.34	26.02	11.43	21.56	15.95
		Familiar																8.41	9.88	10.3	8.05	14.08	4.69	13.32	7.75	7.08	5.06	5.53	8.69
		Novel																15.48	21.65	18.23	15.42	32.65	17.76	34.52	24.26	16.41	10.01	15.26	20.48
Figure 4 Sup3 G		Preference ratio
			Ctnl															Fev/RFP/NrxnTKO
		Day 1	-0.087	0.2316	-0.059	-0.211	-0.501	0.0403	0.0536	-0.182	-0.218	0.3488	-0.053	-0.583	-0.01831	0.032941	0.138636	0.241961	0.176695	-0.34971	-0.21681	-0.04296	-0.30504	0.087179	-0.14885	-0.07677	0.023758	-0.3351	0.451768
		Day 2	-0.086	-0.149	-0.085	0.114	-0.477	0.3725	-0.193	-0.206	-0.011	0.3288	0.0119	-0.007	-0.18317	0.117062	0.174229	-0.21073	-0.04255	-0.11039	0.182338	0.123984	0.128713	-0.22617	-0.34717	-0.05223	0.052632	0.278623	0.172139
		Day 3	0.4579	0.4782	0.5509	0.3269	0.1876	0.1406	0.4548	0.5119	0.5263	0.3838	0.2917	0.6416	0.477699	0.583548	0.452641	0.29594	0.373295	0.277953	0.314018	0.397389	0.582183	0.443144	0.515776	0.39719	0.328467	0.468013	0.404182
	Marble burying
Figure 4 Sup3 H		# of marbles buried
		Cntl	Fev/RFP/NrxnTKO
		3	4
		11	0
		0	2
		0	12
		1	3
		8	5
		2	10
		7	11
		6	4
		4	10
		2	8
		6	8
	Grooming
Figure 4 Sup3 I		Grooming (s)			# of episodes
		Cntl	Fev/RFP/NrxnTKO		Cntl	Fev/RFP/NrxnTKO
		131.97	27.73		6	6
		130.28	105.16		8	10
		65.52	63.66		8	11
		29.61	30.61		10	5
		66.85	88.11		12	7
		8.31	17.54		3	8
		35.68	126.58		8	5
		38.87	1.56		6	1
		42.27	45.97		7	7
		24.61	24.97		7	4
		16.72	18.44		4	5
		13.35	45.6		4	7
